# Supplementary material for: Iron-assisted engineering of molybdenum phosphide nanowires on carbon cloth for efficient hydrogen evolution in a wide pH range
Source: Royal Society of Chemistry journal article supplement (doi:10.1039/c7ta07895a), 2017-01-01
Supplement: c7ta07895a1.pdf [file c7ta07895a1.pdf]

## Supporting Information

### **Iron-assisted engineering of molybdenum phosphide nanowires on carbon cloth for efficient hydrogen evolution at a wide pH range**

Yuan Teng, Xu-Dong Wang, Hong-Yan Chen,\* Jin-Feng Liao, Wen-Guang Li, and Dai-Bin Kuang\*

MOE Key Laboratory of Bioinorganic and Synthetic Chemistry, Lehn Institute of Functional Materials, School of Chemistry, Sun Yat-sen University, Guangzhou 510275, P. R. China. Tel: (+86) 20-8411 4399.

\*E-mail: chenhy33@mail.sysu.edu.cn; kuangdb@mail.sysu.edu.cn

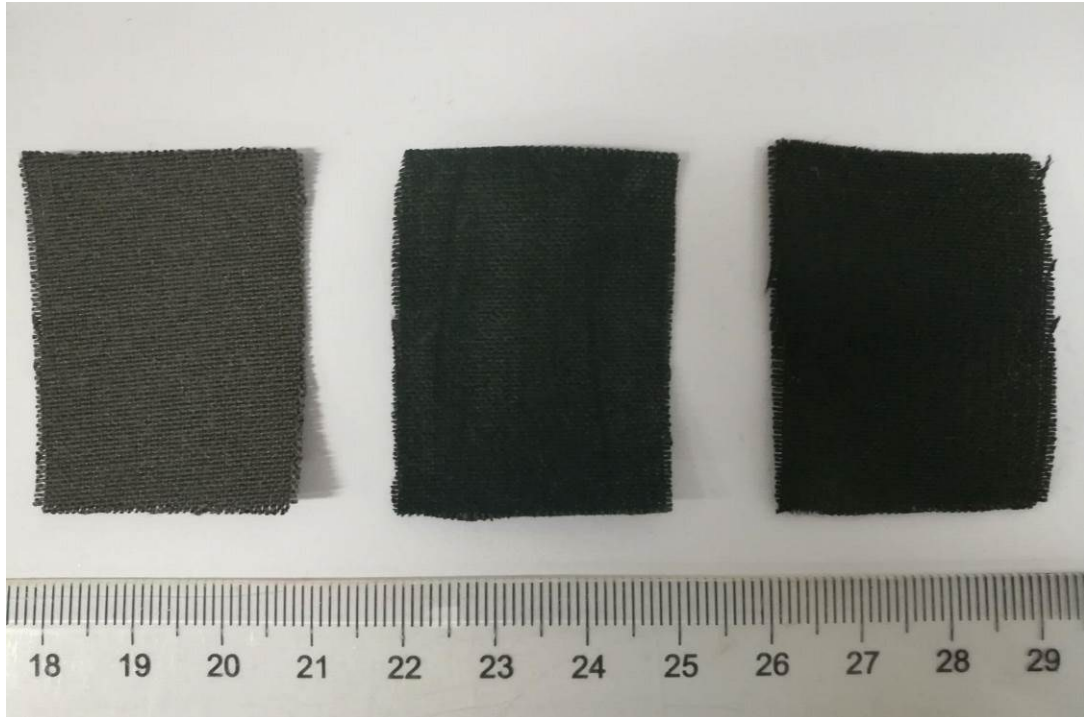

**Fig. S1** Photographs of blank carbon cloth (left), Fe-Mo-O/CC precursor (middle), and MoP NWs/CC sample (right).

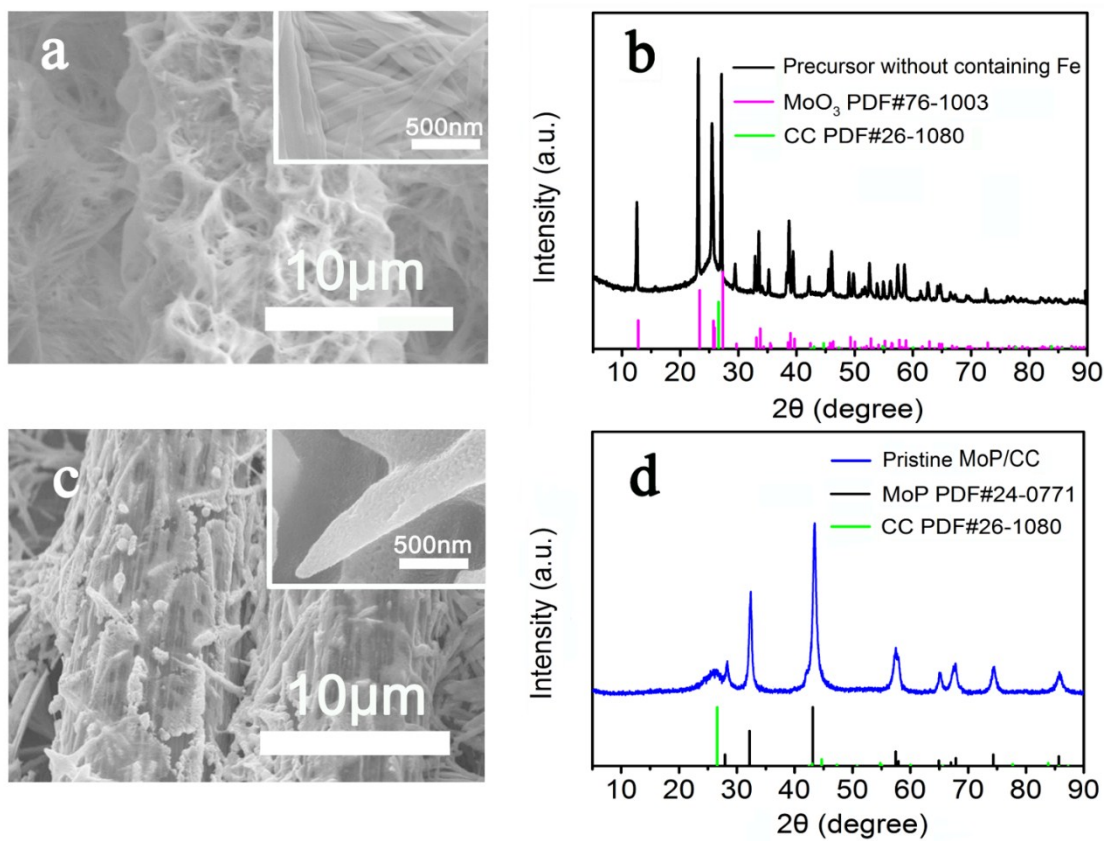

**Fig. S2** SEM images and XRD patterns of MoO<sub>3</sub> precursor prepared without the Fe (a, b) and the corresponding pristine MoP/CC (c, d).

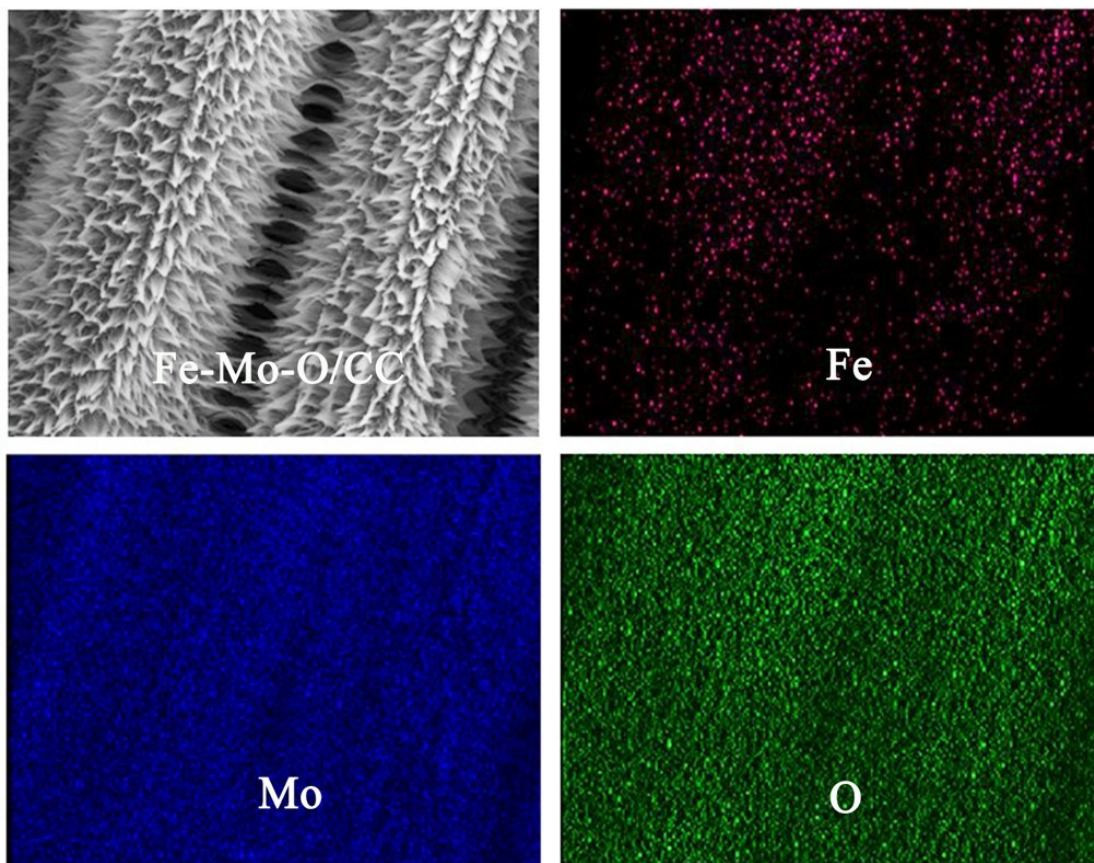

**Fig. S3** EDX elemental mapping images of Fe, Mo and O for Fe-Mo-O/CC precursor. It confirms the even distribution of Fe, Mo and O elements in precursor.

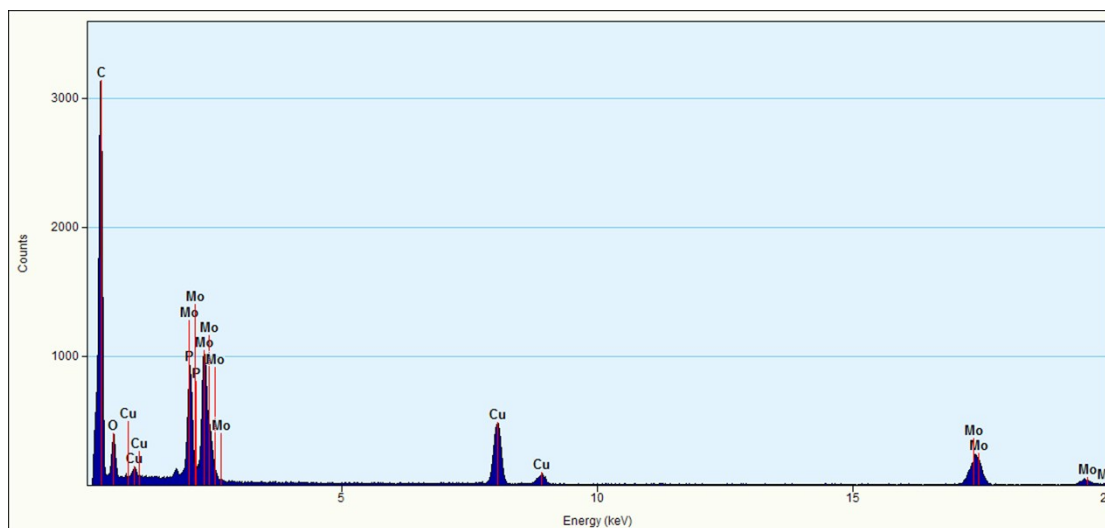

**Fig. S4** EDX spectrum for the MoP NWs/CC.

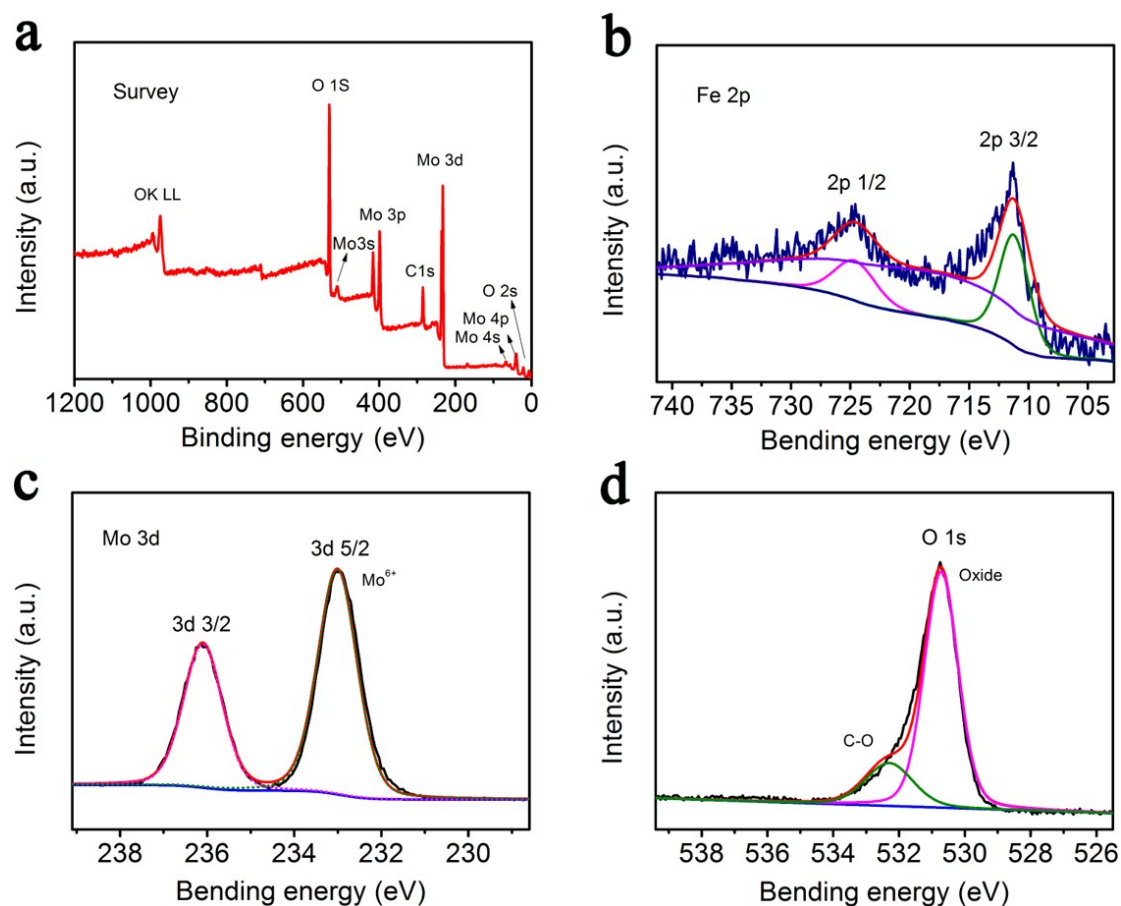

**Fig. S5** XPS pattern of Fe-Mo-O/CC: (a) The survey spectrum shows the presence of Mo, Fe, O, and C element on the surface of sample; (b) Fe 2p spectrum which exhibits two peaks at 711.4 eV and 724.7 eV, respectively, displays the type characteristics of  $\text{Fe}^{3+}$ ; (c) two intense peaks for Mo 3d at 233.2 eV and 236.3 eV correspond to  $\text{Mo}^{6+}$ , which can belong to  $\text{MoO}_3$ ; (d) O 1s region which also presents two peaks at 530.6 eV and 532.3 eV reflects two kinds of oxygen chemical states assigning to the  $\text{O}^{2-}$  ions in oxide and C-O bonds, respectively.

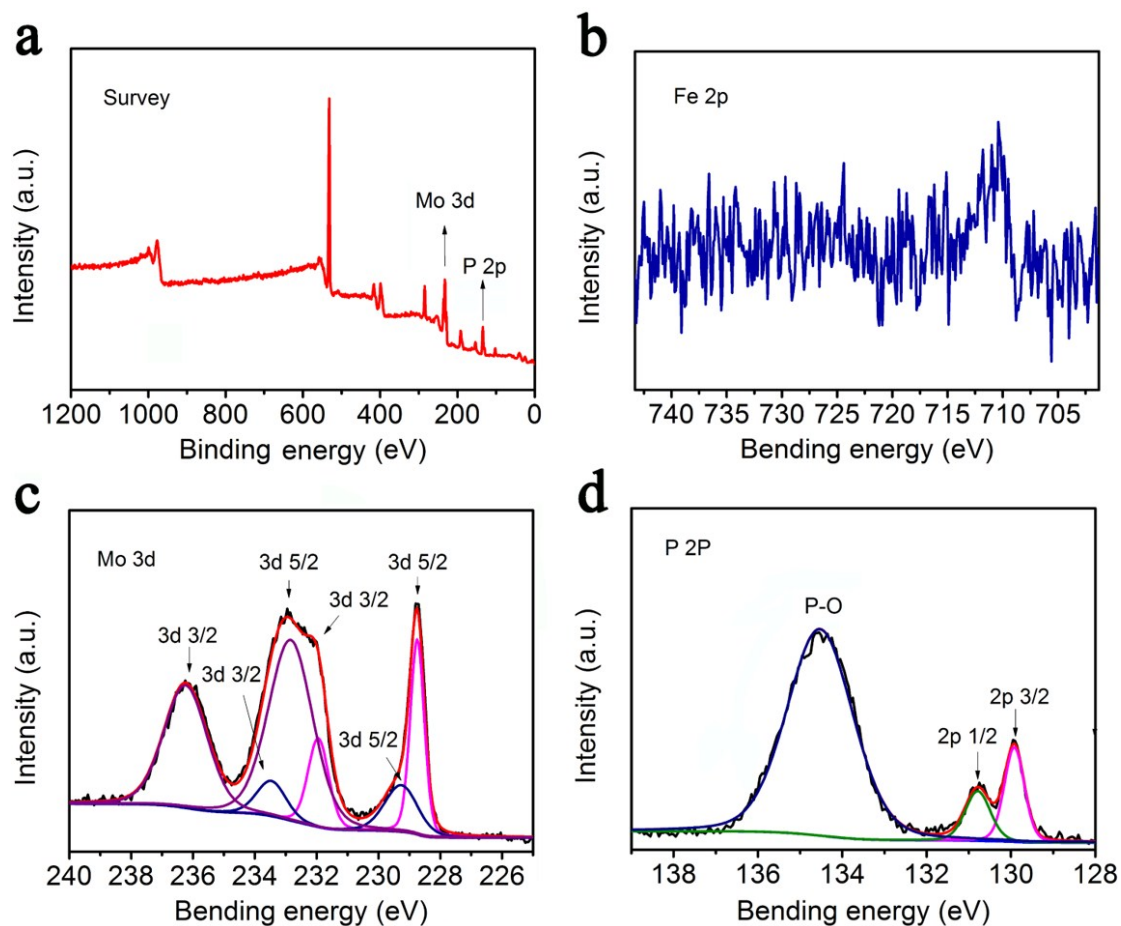

**Fig. S6** (a) XPS survey spectrum of the MoP NWs/CC before acid treatment; (b) Fe 2p; (c) Mo 3d; (d) P 2p regions for the MoP NWs/CC before acid treatment: Fe 2p region shows the existence of Fe at high valence; the Mo 3d region, except for the peaks of MoP, also exhibits others peaks that can be attributed to high valence Mo species arising from the further surface oxidation and some residual MoO<sub>2</sub>; for P 2p region, large packet peak at high bending energy belongs to P-O species that are also due to superficial oxidation, and P 2p region can be assigned to P into phosphide.

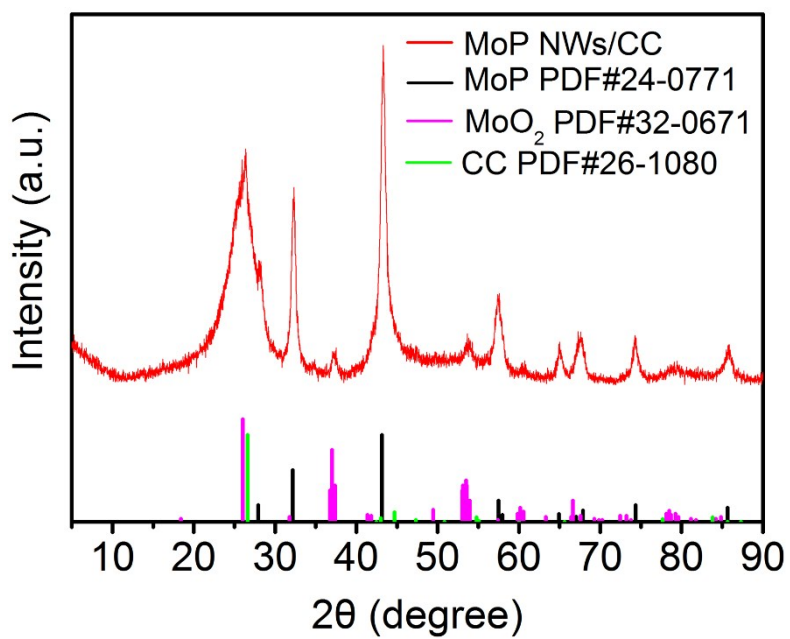

**Fig. S7** XRD pattern of the MoP NWs/CC before acid treatment, which shows small peaks indexed to MoO<sub>2</sub> residual.



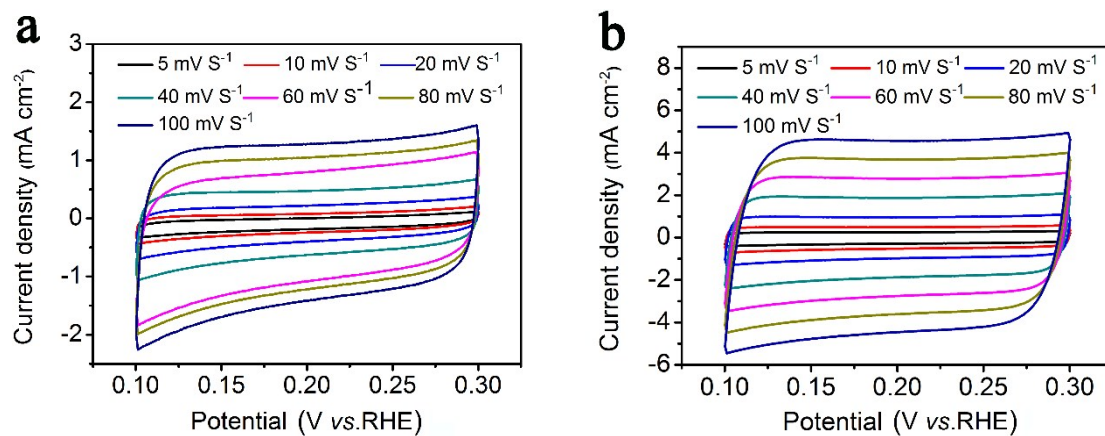

**Fig. S8** Cyclic voltammograms in the region of 0.1-0.3 V vs. RHE at various scan rates of (a) pristine MoP/CC and (b) MoP NWs/CC.

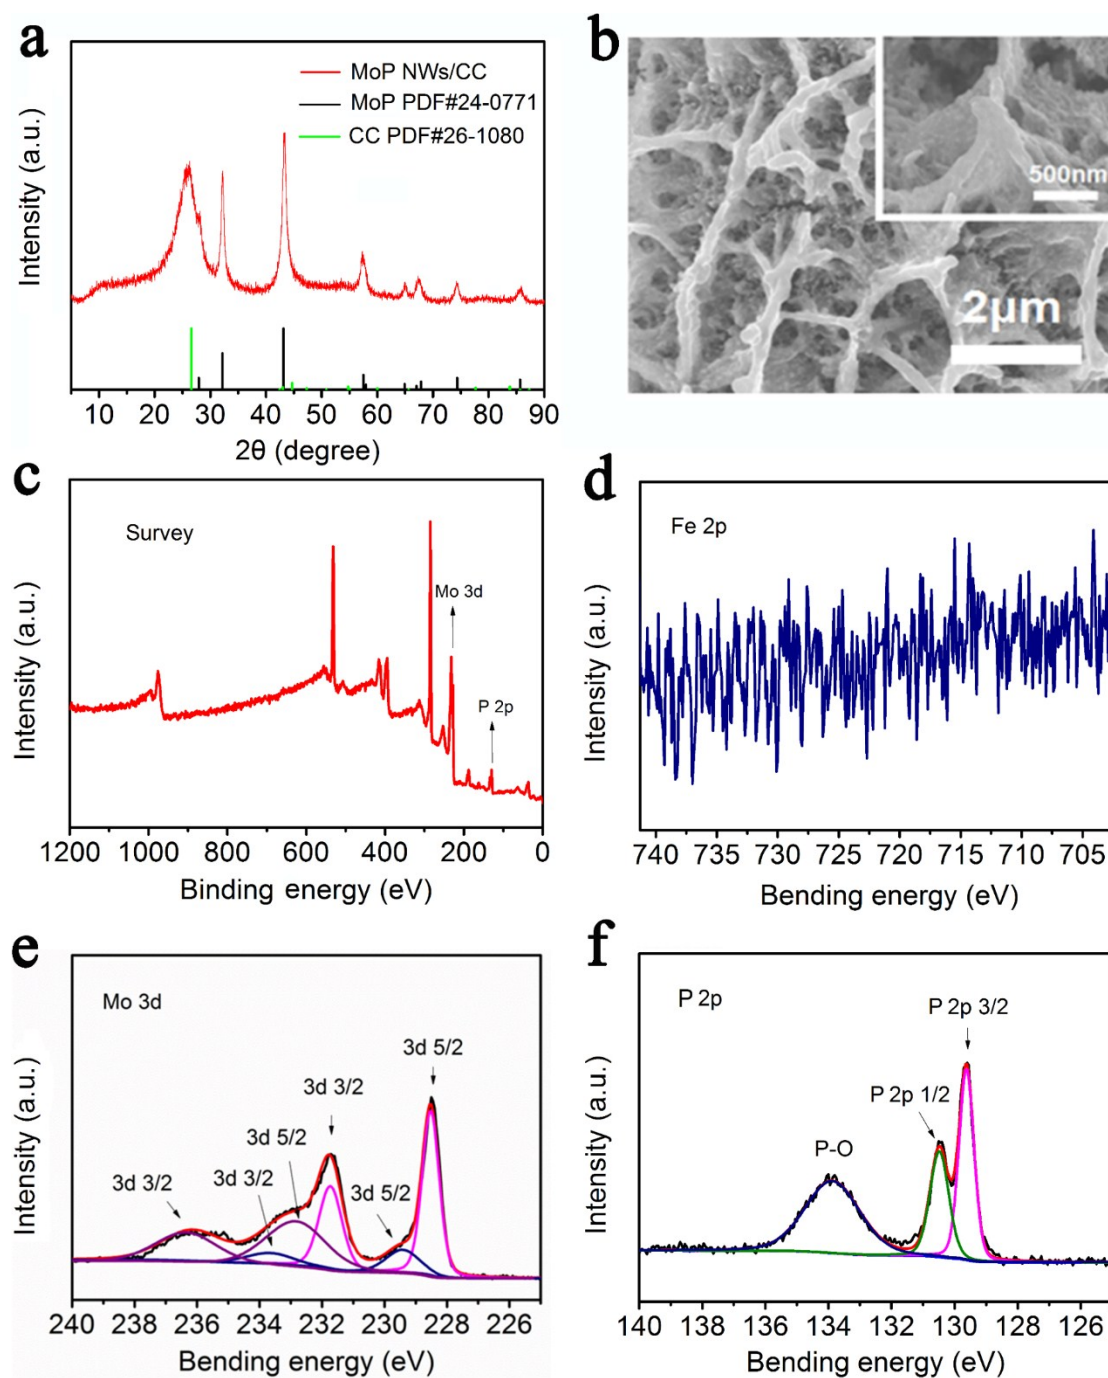

**Fig. S9** Structure and composition characterization of the MoP NWs/CC after a 24 h stability test: (a) XRD pattern presents a pure MoP phase; (b) the SEM images after stability tests doesn't appear to induce obvious morphological changes; (c-f) XPS spectrum after the stability tests indicates the well-maintained surface chemical state.

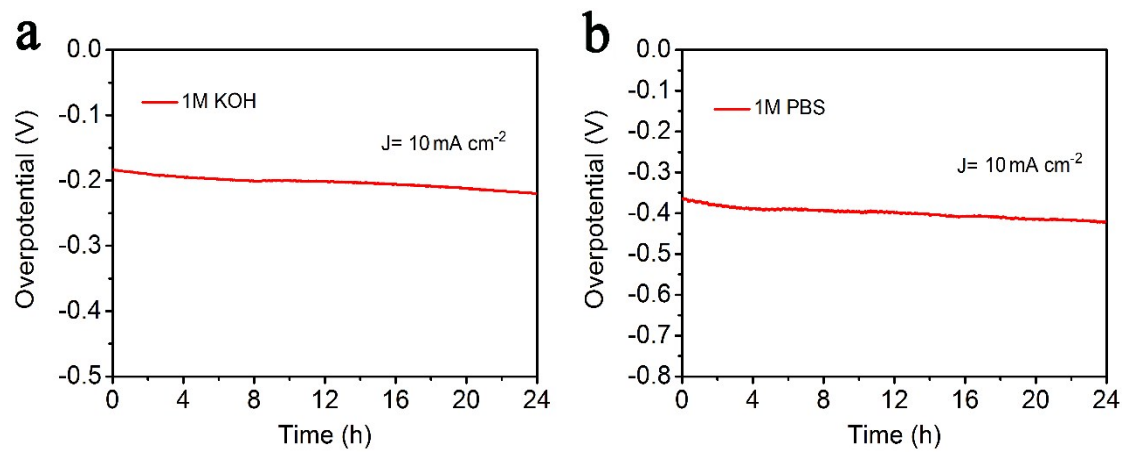

**Fig. S10** Chronopotentiometric curves for the CV-processed MoP NWs/CC at a static current density of  $10 \text{ mA cm}^{-2}$  for 24 h in 1 M KOH (a) and 1 M PBS (b) electrolytes, respectively.

**Table S1 Comparison of HER performance in acid electrolytes for HER electrocatalysts in the literatures and this work**

| Catalysts           | Loading mass (mg cm <sup>-2</sup> ) | Tafel slope (mV dec <sup>-1</sup> ) <sup>1)</sup> | Current density ( <i>j</i> , mA cm <sup>-2</sup> ) <sup>2)</sup> | Overpotential at the corresponding <i>j</i> (mV) | Exchange current density ( <i>j</i> , mA cm <sup>-2</sup> ) | Ref.      |
|---------------------|-------------------------------------|---------------------------------------------------|------------------------------------------------------------------|--------------------------------------------------|-------------------------------------------------------------|-----------|
| MoP                 | 0.071                               | 60                                                | 10                                                               | 246                                              | 0.004                                                       | 1         |
| MoP-CA <sub>2</sub> | 0.36                                | 54                                                | 10/100                                                           | 125/200                                          | 0.086                                                       | 2         |
| Commercial MoP      | ~0.1                                | 50                                                | 10                                                               | 150                                              | 0.01                                                        | 3         |
| MoP                 | ~1                                  | 50                                                | 10/100                                                           | 117/180                                          | 0.05                                                        | 4         |
| MoP S               | ~3                                  | 50                                                | 10/100                                                           | 64/120                                           | 0.57                                                        | 4         |
| Mo-W-P              | 4.0                                 | 52                                                | 20/100                                                           | 93/138                                           | -                                                           | 16        |
| MoP <sub>2</sub>    | 1                                   | 52                                                | 10/100                                                           | 121/193                                          | -                                                           | 5         |
| Fe-promoted MoP     | 0.071                               | 49                                                | 10                                                               | 195                                              | -                                                           | 6         |
| Pristine MoP/CC     | 2                                   | 60.8                                              | 10/100                                                           | 173/241                                          | 0.014                                                       | This work |
| MoP NWs/CC          | 2                                   | 53.3                                              | 10/100                                                           | 113/174                                          | 0.075                                                       | This work |

**Table S2 Comparison of HER performance in alkaline electrolytes for HER electrocatalysts in the literatures and this work**

| Catalysts                       | Loading mass (mg cm <sup>-2</sup> ) | Tafel slope (mV dec <sup>-1</sup> ) | Current density ( $j$ , mA cm <sup>-2</sup> ) | Overpotential at the corresponding $j$ (mV) | Exchange current density ( $j$ , mA cm <sup>-2</sup> ) | Ref.      |
|---------------------------------|-------------------------------------|-------------------------------------|-----------------------------------------------|---------------------------------------------|--------------------------------------------------------|-----------|
| CoP/CC                          | 0.92                                | 129                                 | 10                                            | 209                                         | -                                                      | 7         |
| FeP/CC                          | 1.5                                 | 146                                 | 10                                            | 218                                         | -                                                      | 8         |
| WP/CC                           | 2                                   | 102                                 | 10                                            | 150                                         | -                                                      | 9         |
| MoB                             | 2.3                                 | 59                                  | 5                                             | 250                                         | 0.002                                                  | 10        |
| MoC <sub>x</sub>                | 0.8                                 | 59                                  | 10                                            | 151                                         | 0.029                                                  | 11        |
| Mo <sub>2</sub> C-NCNT          | ~3                                  | -                                   | 10                                            | 257                                         | -                                                      | 12        |
| Ni                              | -                                   | -                                   | 10                                            | 400                                         | -                                                      | 10        |
| Co-S/FTO                        | 0.0796                              | -                                   | 1                                             | 480                                         | -                                                      | 15        |
| Amorphous MoS <sub>2</sub> /FTO | -                                   | -                                   | 10                                            | 540                                         | -                                                      | 17        |
| Ni wire                         | -                                   | -                                   | 10                                            | 350                                         | -                                                      | 18        |
| Pristine MoP/CC                 | 2                                   | 86.1                                | 10/100                                        | 231/332                                     | 0.021                                                  | This work |
| MoP NWs/CC                      | 2                                   | 65.6                                | 10/100                                        | 103/181                                     | 0.279                                                  | This work |

**Table S3 Comparison of HER performance in neutral electrolytes for HER electrocatalysts in the literatures and this work**

| Catalysts                   | Loading mass (mg cm <sup>-2</sup> ) | Tafel slope (mV dec <sup>-1</sup> ) | Current density ( <i>j</i> , mA cm <sup>-2</sup> ) | Overpotential at the corresponding <i>j</i> (mV) | Exchange current density ( <i>j</i> , mA cm <sup>-2</sup> ) | Ref.      |
|-----------------------------|-------------------------------------|-------------------------------------|----------------------------------------------------|--------------------------------------------------|-------------------------------------------------------------|-----------|
| Co-NRCNTs                   | ~0.28                               | -                                   | 2/10                                               | 380/540                                          | -                                                           | 13        |
| Mo <sub>2</sub> B           | 2.3                                 | -                                   | 1                                                  | 250                                              | -                                                           | 10        |
| Mo <sub>2</sub> C           | -                                   | -                                   | 1                                                  | 200                                              | -                                                           | 10        |
| H <sub>2</sub> -CoCat/FTO   | -                                   | 140                                 | 2                                                  | 385                                              | -                                                           | 14        |
| CuMoS <sub>4</sub> crystals | 0.0416                              | 95                                  | 2                                                  | 210                                              | -                                                           | 19        |
| Pristine MoP/CC             | 2                                   | 147.8                               | 2/10                                               | 289/412                                          | 0.016                                                       | This work |
| MoP NWs/CC                  | 2                                   | 119.4                               | 2/10                                               | 63/232                                           | 0.114                                                       | This work |

## References

- 1 X. B. Chen, D. Z. Wang, Z. P. Wang, P. Zhou, Z. Z. Wu, F. Jiang, *Chem. Commun.*, 2014, **50**, 11683-11685.
- 2 Z. C. Xing, Q. Liu, A. M. Asiri, X. P. Sun, *Adv. Mater.*, 2014, **26**, 5702-5707.
- 3 T. Y. Wang, K. Z. Du, W. L. Liu, Z. W. Zhu, Y. H. Shao, M. X. Li, *J. Mater. Chem. A*, 2015, **3**, 4368-4373.
- 4 J. Kibsgaard, T. F. Jaramillo, *Angew. Chem. Int. Ed.*, 2014, **53**, 14433-14437.
- 5 T. L. Wu, M. Y. Pi, D. K. Zhang, S. J. Chen, *J. Power Sources*, 2016, **328**, 551-557.
- 6 X. Liang, D. Z. Zhang, Z. Z. Wu, D. Z. Wang, *Appl. Catal. A: Gen.*, 2016, **524**, 134-138.
- 7 J. Q. Tian, Q. Liu, A. M. Asiri, X. P. Sun, *J. Am. Chem. Soc.*, 2014, **136**, 7587-7590.
- 8 Y. H. Liang, Q. Liu, A. M. Asiri, X. P. Sun, Y. L. Luo, *ACS Catal.*, 2014, **4**, 4065-4069.
- 9 Z. H. Pu, Q. Liu, A. M. Asiri, X. P. Sun, *ACS Appl. Mater. Interfaces*, 2014, **6**, 21874-21879.
- 10 H. Vrubel, X. L. Hu, *Angew. Chem. Int. Ed.*, 2012, **51**, 12703-12706.
- 11 H. B. Wu, B. Y. Xia, L. Yu, X.-Y. Yu, X. W. Lou, *Nat. Chem.*, 2015, **6**, 6512.
- 12 K. Zhang, Y. Zhao, D. Y. Fu, Y. J. Chen, *J. Mater. Chem. A*, 2015, **3**, 5783-5788.
- 13 X. X. Zou, X. X. Huang, A. Goswami, R. Silva, B. R. Sathe, E. Mikmeková, T. Asefa, *Angew. Chem. Int. Ed.*, 2014, **53**, 4372-4376.
- 14 S. Cobo, J. Heidkamp, P.-A. Jacques, J. Fize, V. Fourmond, L. Guetaz, B. Joussetme, V. Ivanova, H. Dau, S. Palacin, M. Fontecave, V. Artero, *Nat. Mater*, 2012, **11**, 802-807.
- 15 Y. J. Sun, C. Liu, D. C. Grauer, J. Yano, J. R. Long, P. D. Yang, C. J. Chang, *J. Am. Chem. Soc.*, 2013, **135**, 17699-17702.
- 16 X. D. Wang, Y. F. Xu, H. S. Rao, W. J. Xu, H. Y. Chen, W. X. Zhang, D. B. Kuang and C. Y. Su, *Energy Environ. Sci.*, 2016, **9**, 1468-1475.
- 17 D. Merki, S. Fierro, H. Vrubel and X. L. Hu, *Chem. Sci.*, 2011, **2**, 1262-1267.
- 18 J. R. McKone, B. F. Sadler, C. A. Werlang, N. S. Lewis, H. B. Gray, *ACS Catal.*, 2013, **3**, 166-169.
- 19 P. D. Tran, M. Nguyen, S. S. Pramana, A. Bhattacharjee, S. Y. Chiam, J. Fize, M. J. Field, V. Artero, L. H. Wong, J. Loo and J. Barber, *Energy Environ. Sci.* 2012, **5**, 8912-8916.

## Supplementary Movie

This video exhibits as-synthesized MoP NWs/CC electrode operated at a large current density of 80 mA cm<sup>-2</sup> to drive hydrogen evolution reaction in 0.5 M H<sub>2</sub>SO<sub>4</sub> solution. Substantial hydrogen bubbles are generated and quickly released from the electrodes.
